# Supplementary material
Source: PubMed Central journal article supplement (PMC3259571)
Supplement: NIHMS338084-supplement-1_si_001.pdf [file NIHMS338084-supplement-1_si_001.pdf]

**Supporting Information** for “Rapid Crystallization of L-Alanine on Engineered Surfaces using Metal-Assisted and Microwave-Accelerated Evaporative Crystallization” Alabanza et. al.

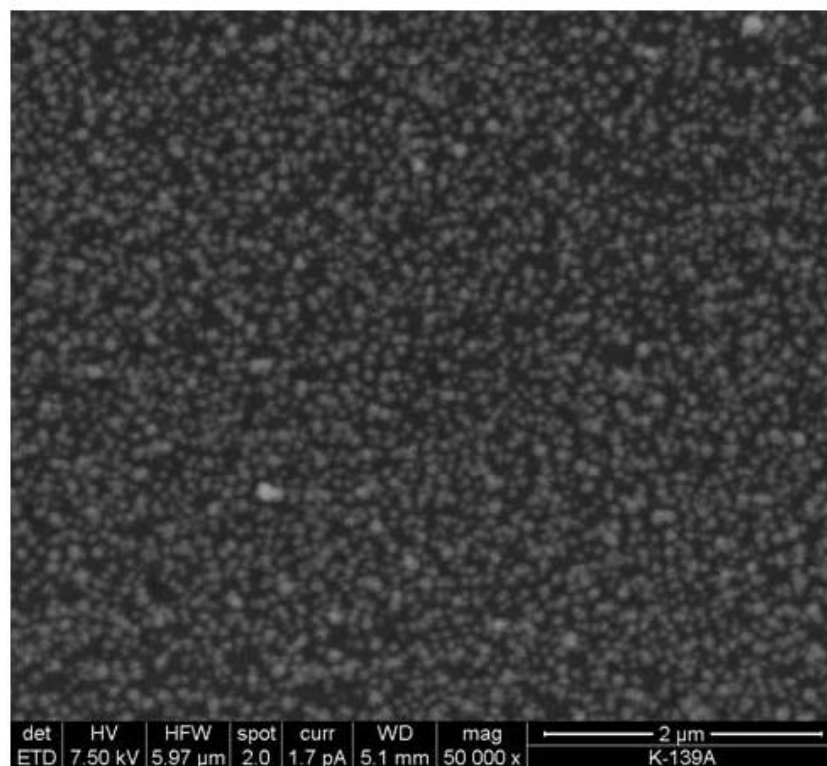

**Figure S1.** Time progression of the growth of L-alanine crystals on blank glass slides using MAEC technique at microwave power level 5. Actual length of the crystals are x4 of the lengths shown here.

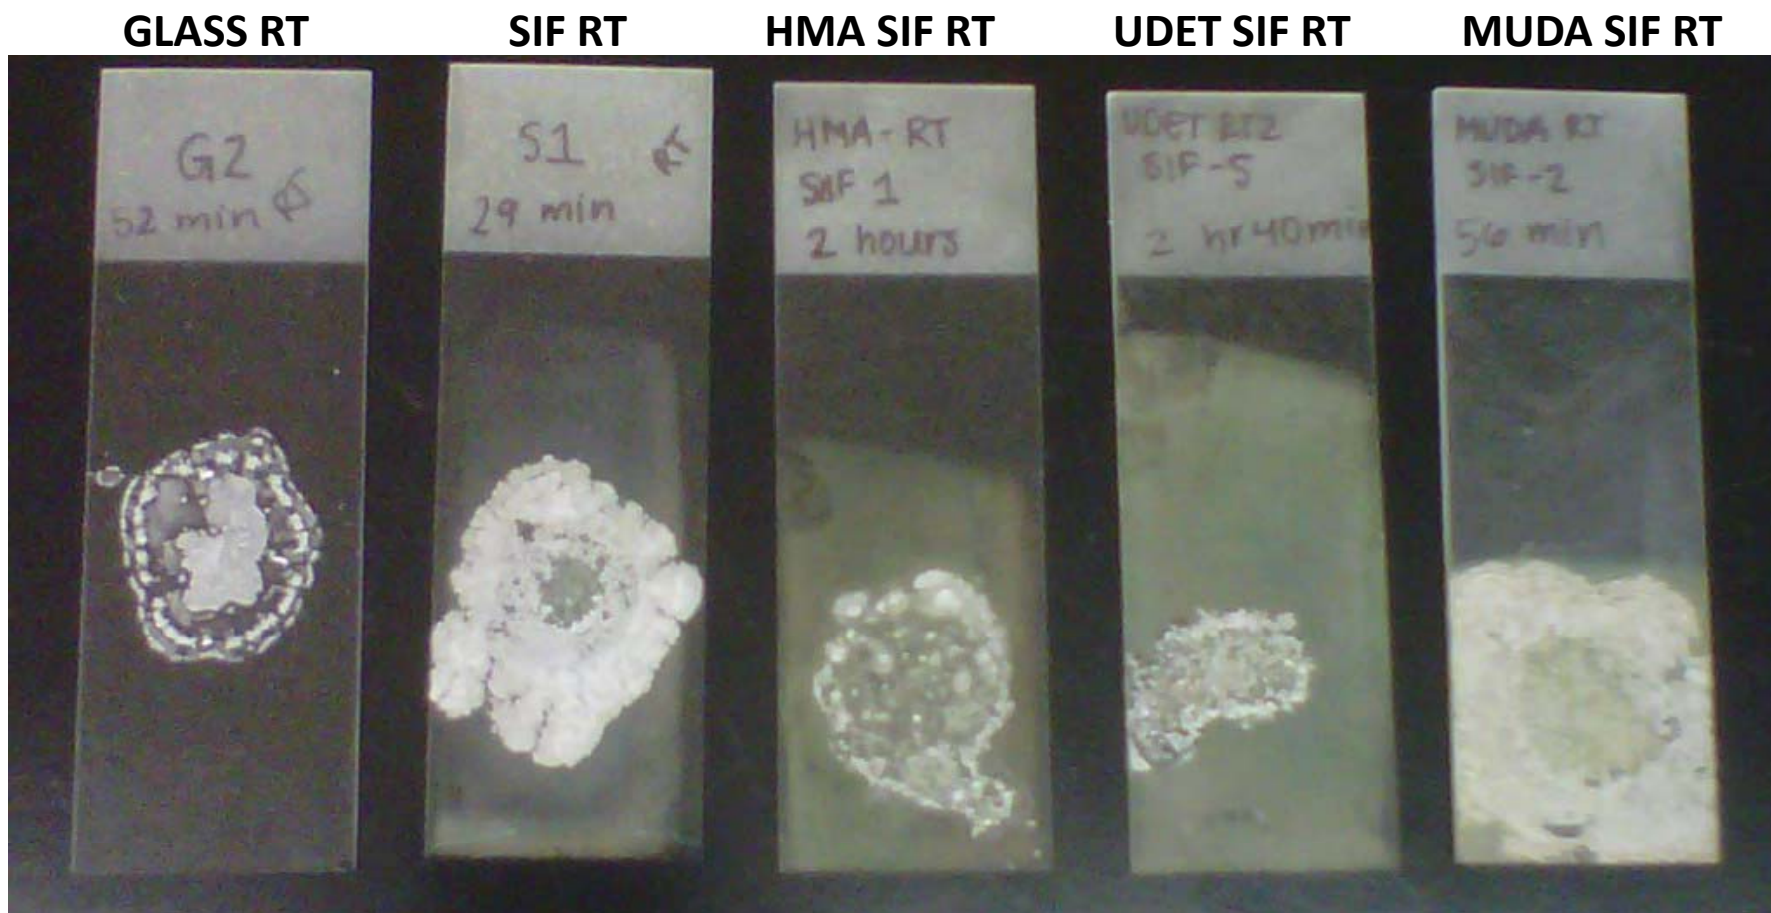

**Figure S2.** Time progression of the growth of L-alanine crystals on blank glass slides using MAEC technique at microwave power level 5. Actual length of the crystals are x4 of the lengths shown here.

HMA\_SIFs\_MW\_PL5

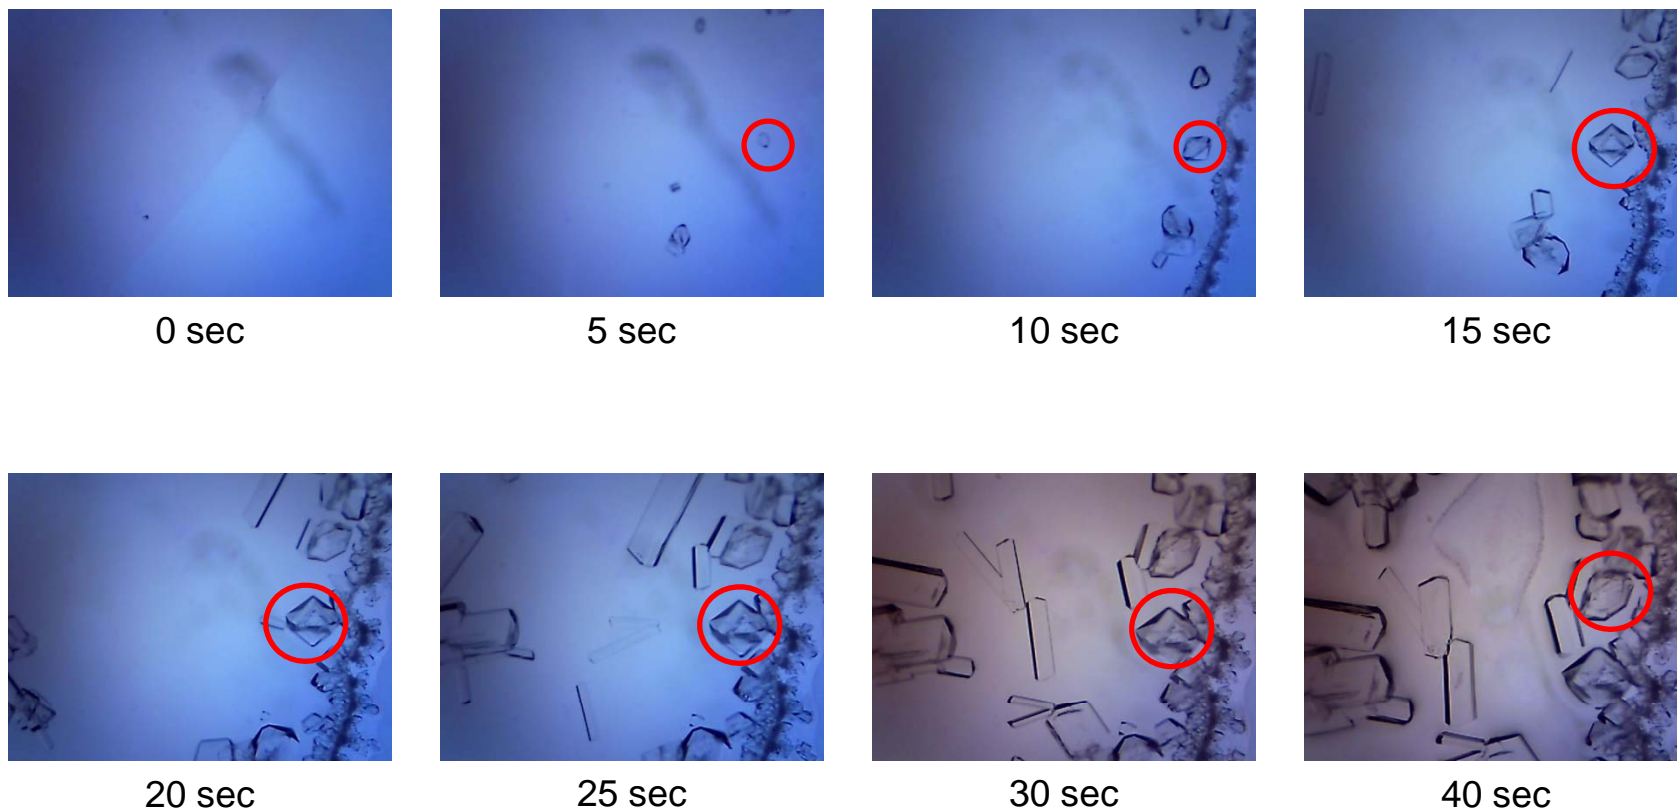

**Figure S3.** Time progression of the growth of L-alanine crystals on SIFs with HMA surface modification using MA-MAEC technique at microwave power level 5.

HMA\_SIFs\_MW\_PL10

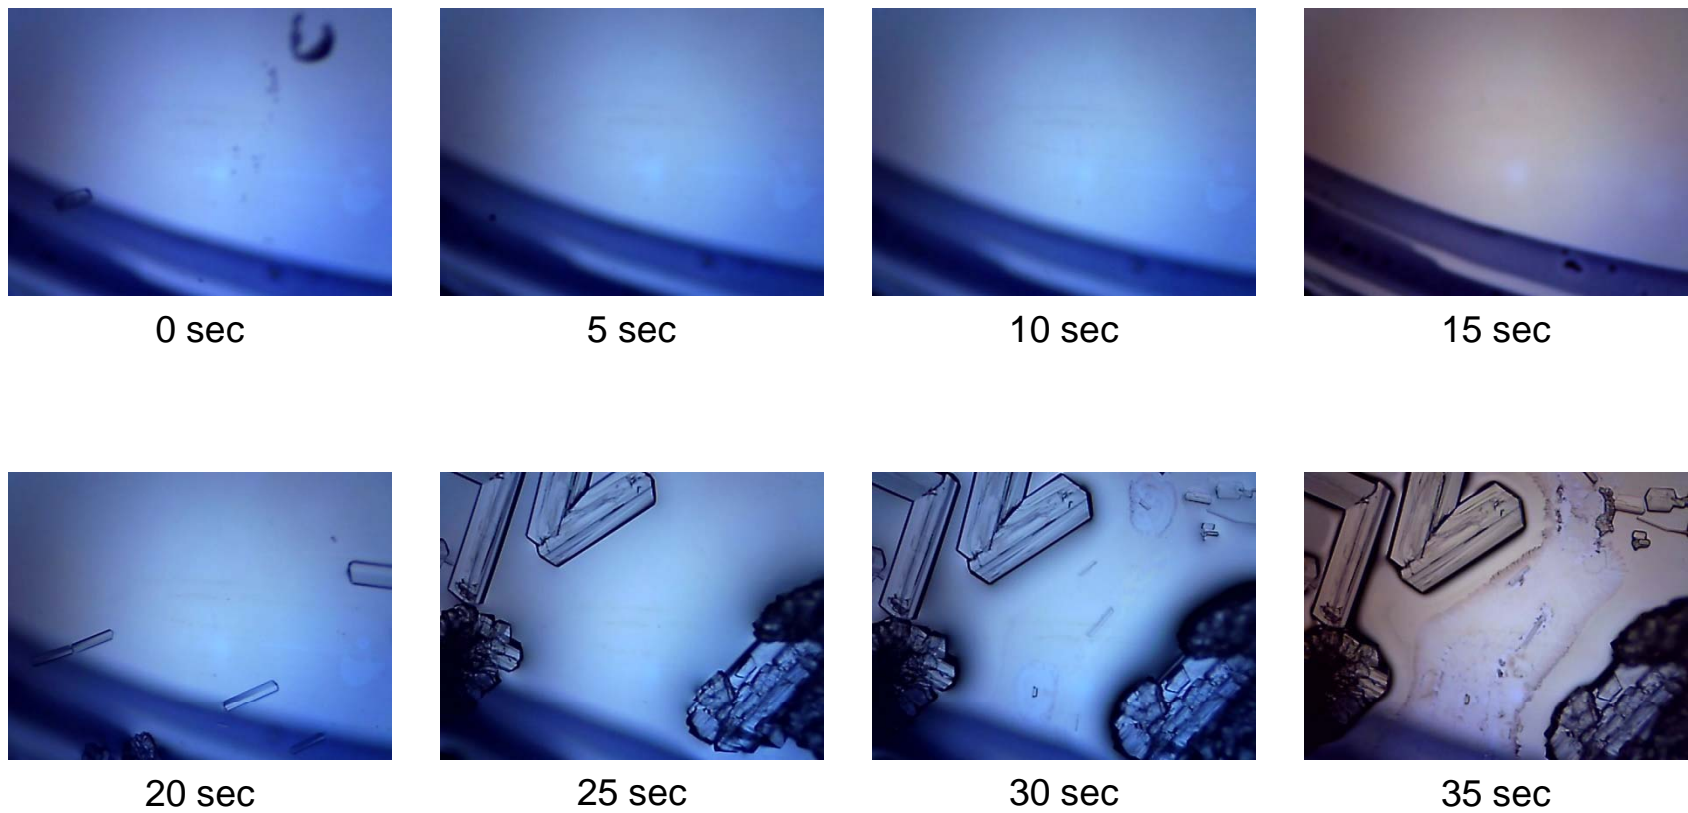

**Figure S4.** Time progression of the growth of L-alanine crystals on SIFs with HMA surface modification using MA-MAEC technique at microwave power level 10.



UDET\_SIFs\_MW\_PL5

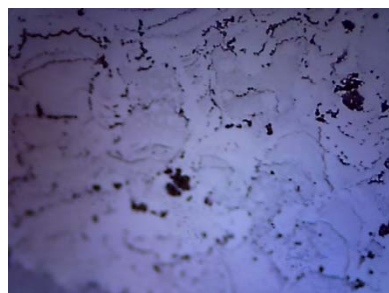

0 sec

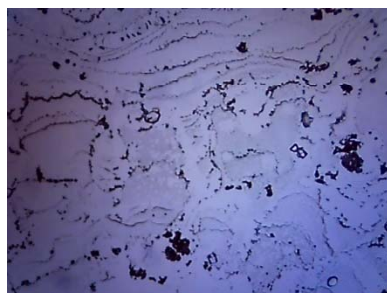

5 sec

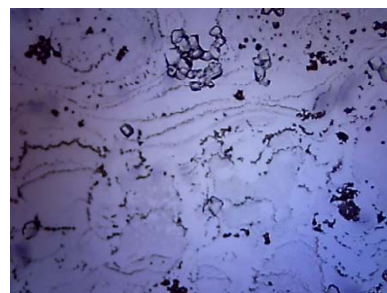

10 sec

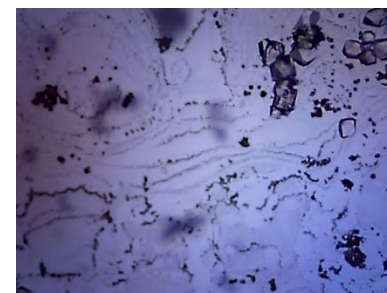

15 sec

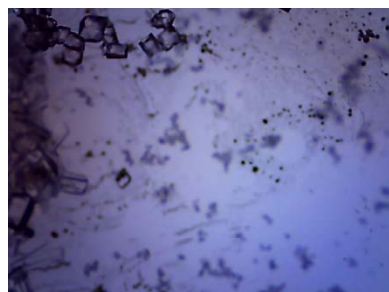

20 sec

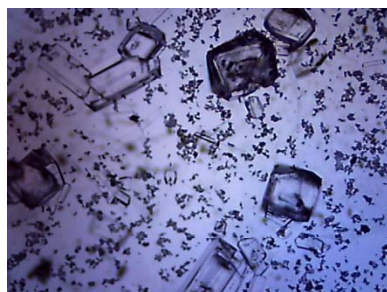

30 sec

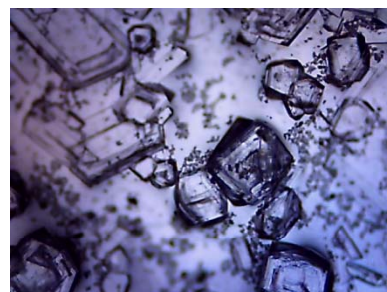

40 sec

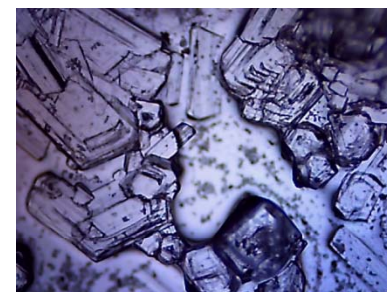

50 sec

**Figure S5.** Time progression of the growth of L-alanine crystals on SIFs with UDET surface modification using MA-MAEC technique at microwave power level 5.

# UDET\_SIFs \_ MW\_PL10

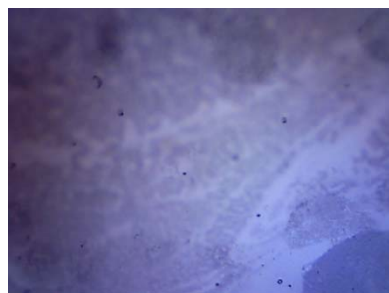

0 sec

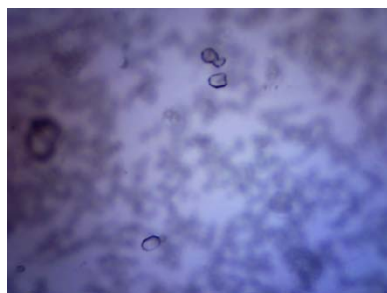

10 sec

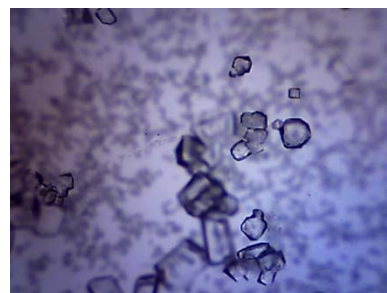

15 sec

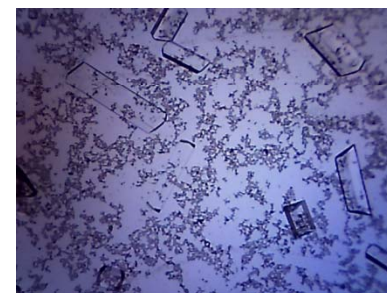

20 sec

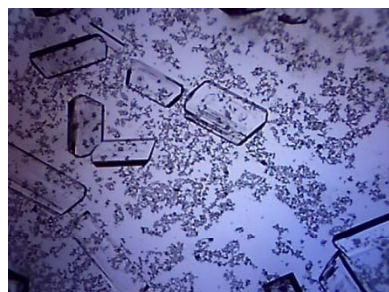

25 sec

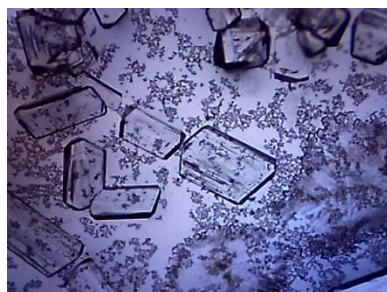

30 sec

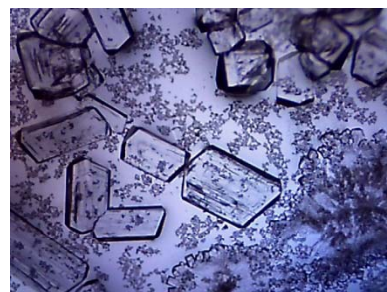

35 sec

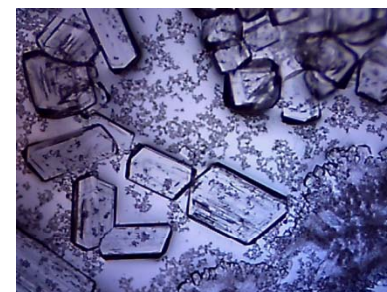

40 sec

**Figure S6.** Time progression of the growth of L-alanine crystals on SIFs with UDET surface modification using MA-MAEC technique at microwave power level 10.



MUDA\_SIFs\_RT

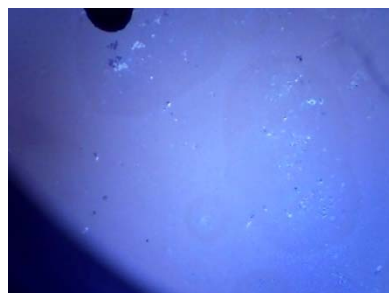

0 min

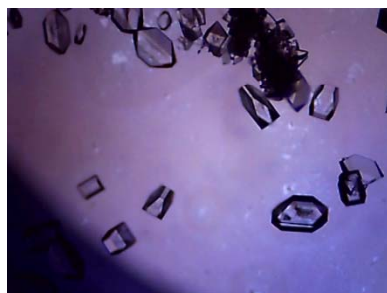

5 min

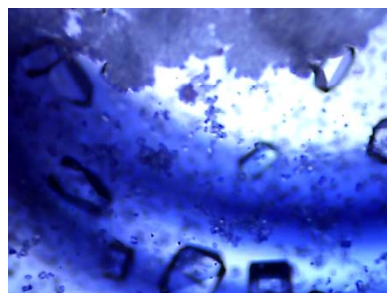

10 min

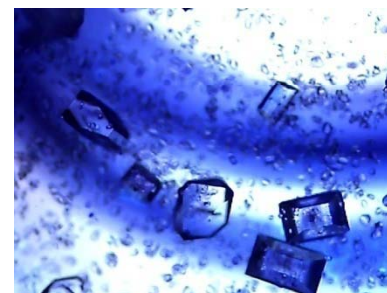

15 min

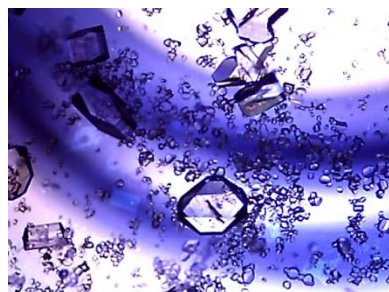

20 min

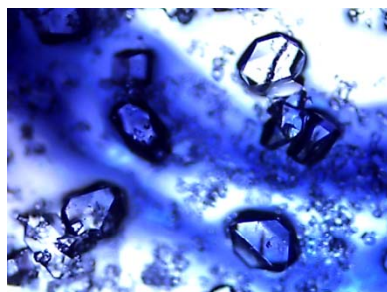

30 min

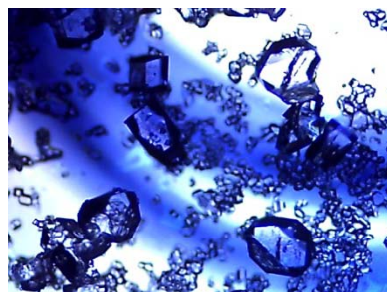

35 min

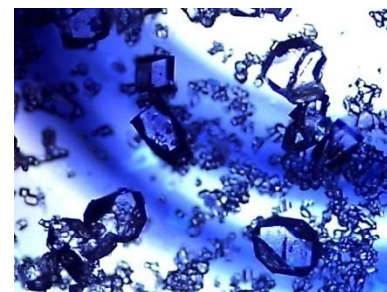

40 min

**Figure S7.** Time progression of the growth of L-alanine crystals on SIFs with MUDA surface modification at room temperature.

MUDA\_SIFs\_MW\_PL1

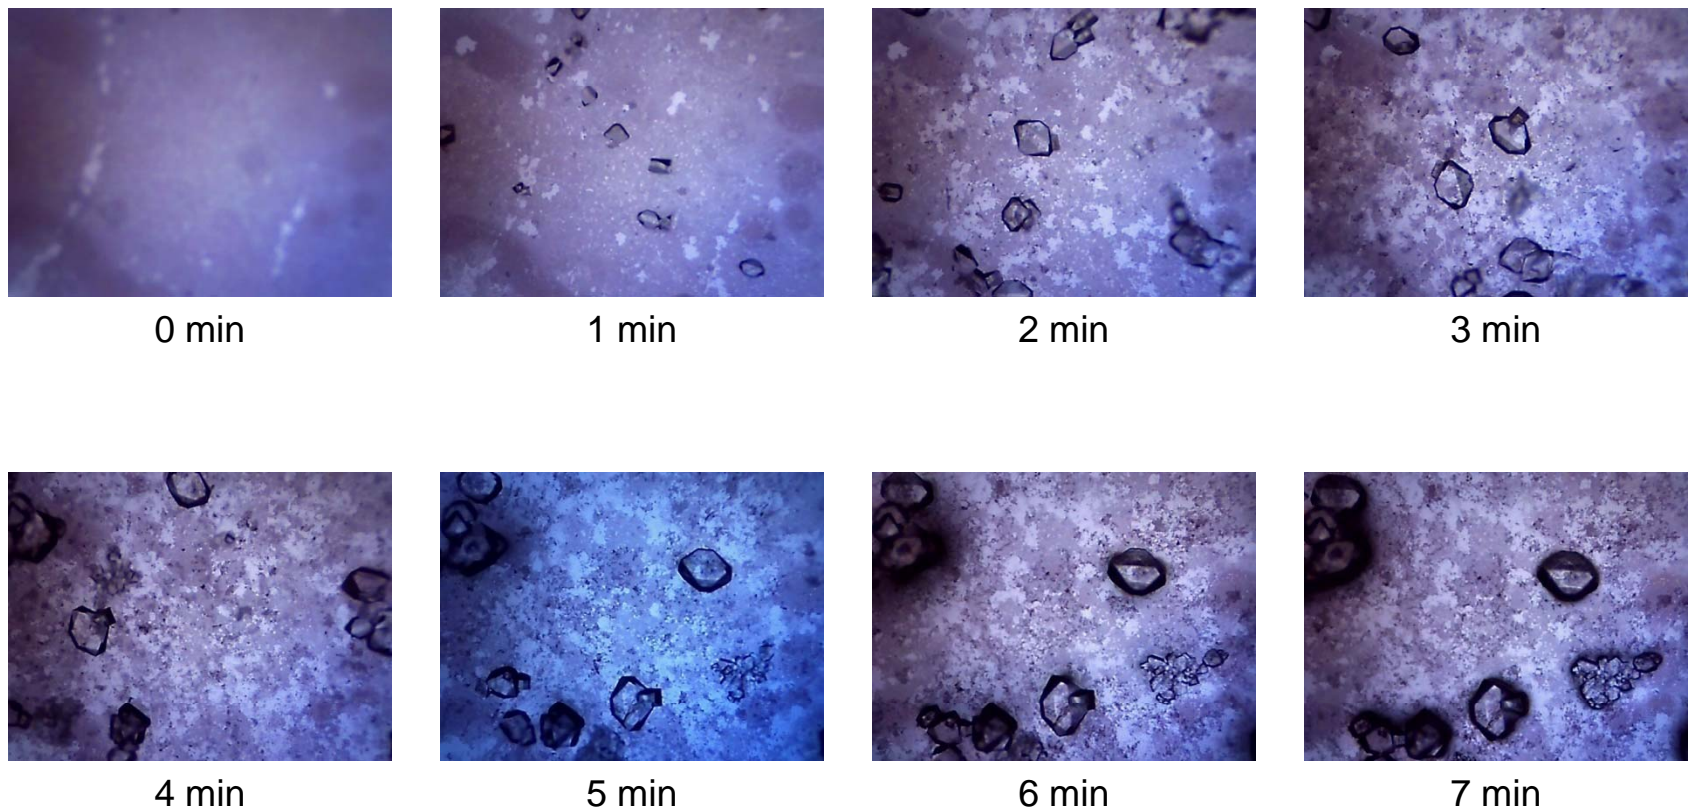

**Figure S8.** Time progression of the growth of L-alanine crystals on SIFs with MUDA surface modification using MA-MAEC technique at microwave power level 1.



MUDA\_SIFs\_MW\_PL5

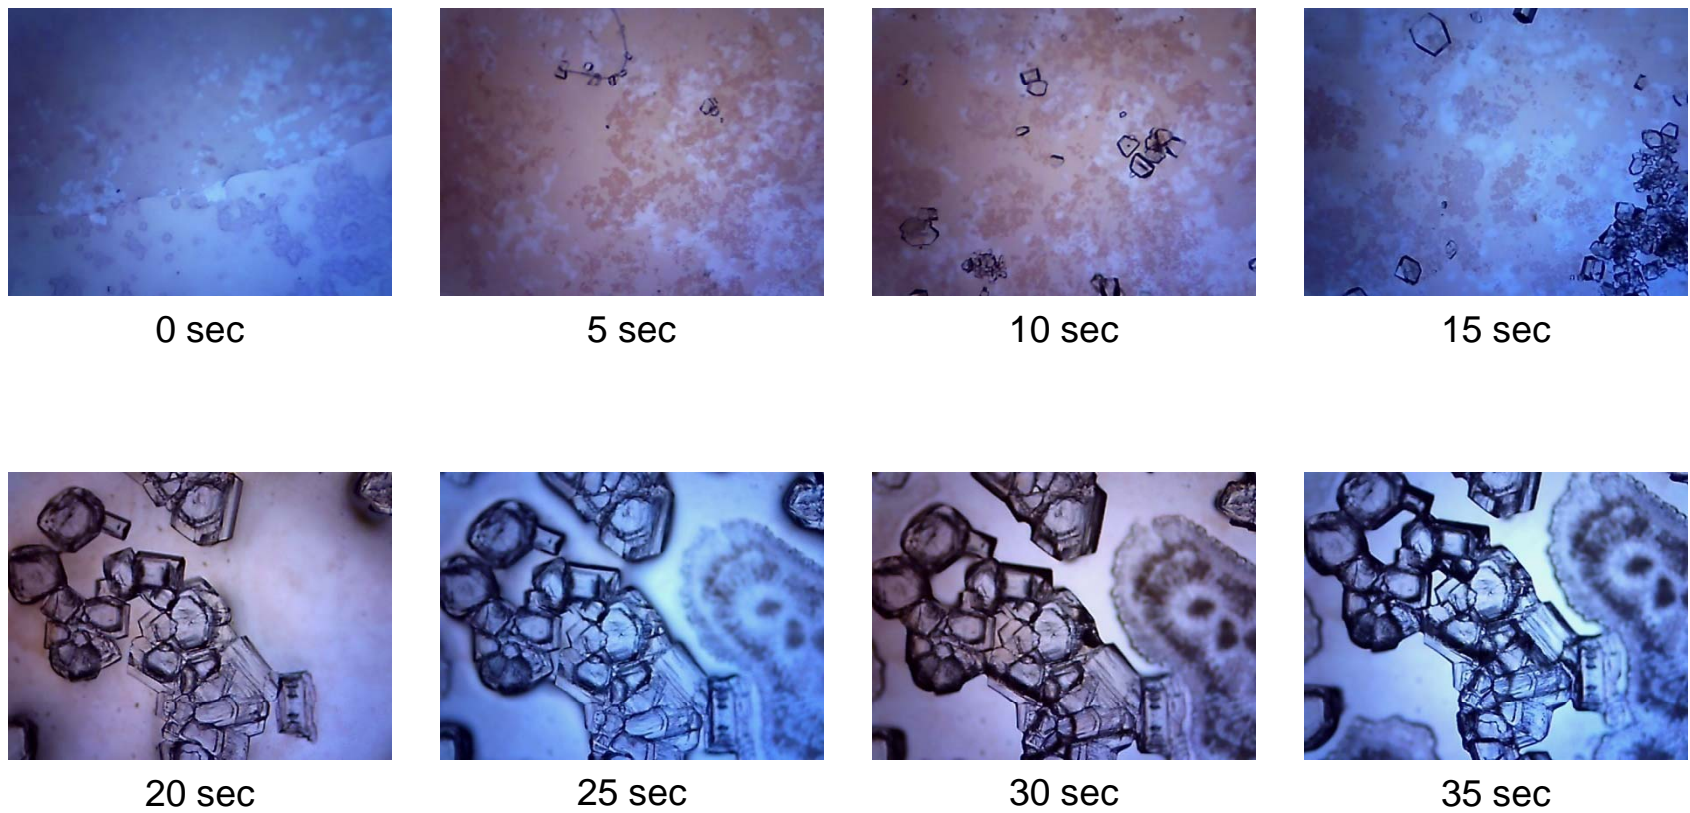

**Figure S9.** Time progression of the growth of L-alanine crystals on SIFs with MUDA surface modification using MA-MAEC technique at microwave power level 5.

# MUDA\_SIFs \_ MW\_PL10

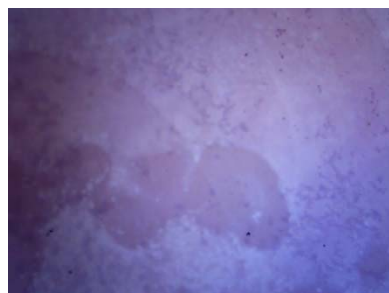

0 sec

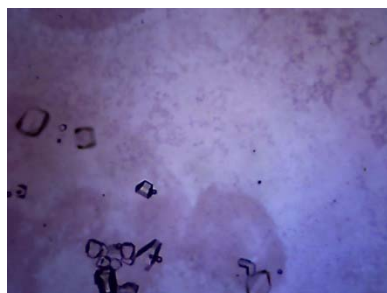

10 sec

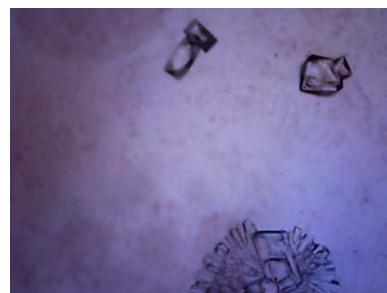

15 sec

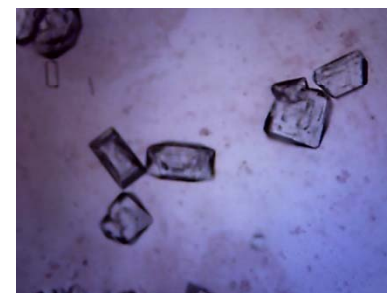

20 sec

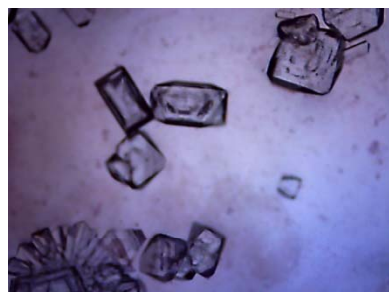

25 sec

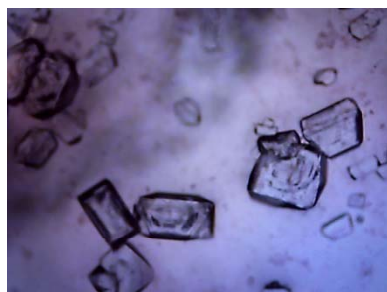

30 sec

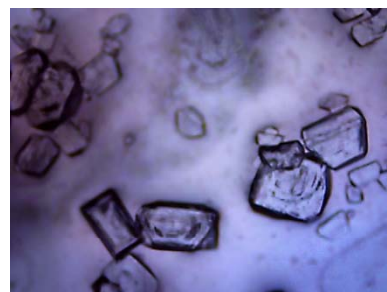

35 sec

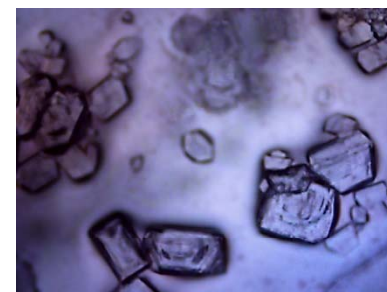

40 sec

**Figure S10.** Time progression of the growth of L-alanine crystals on SIFs with MUDA surface modification using MA-MAEC technique at microwave power level 10.

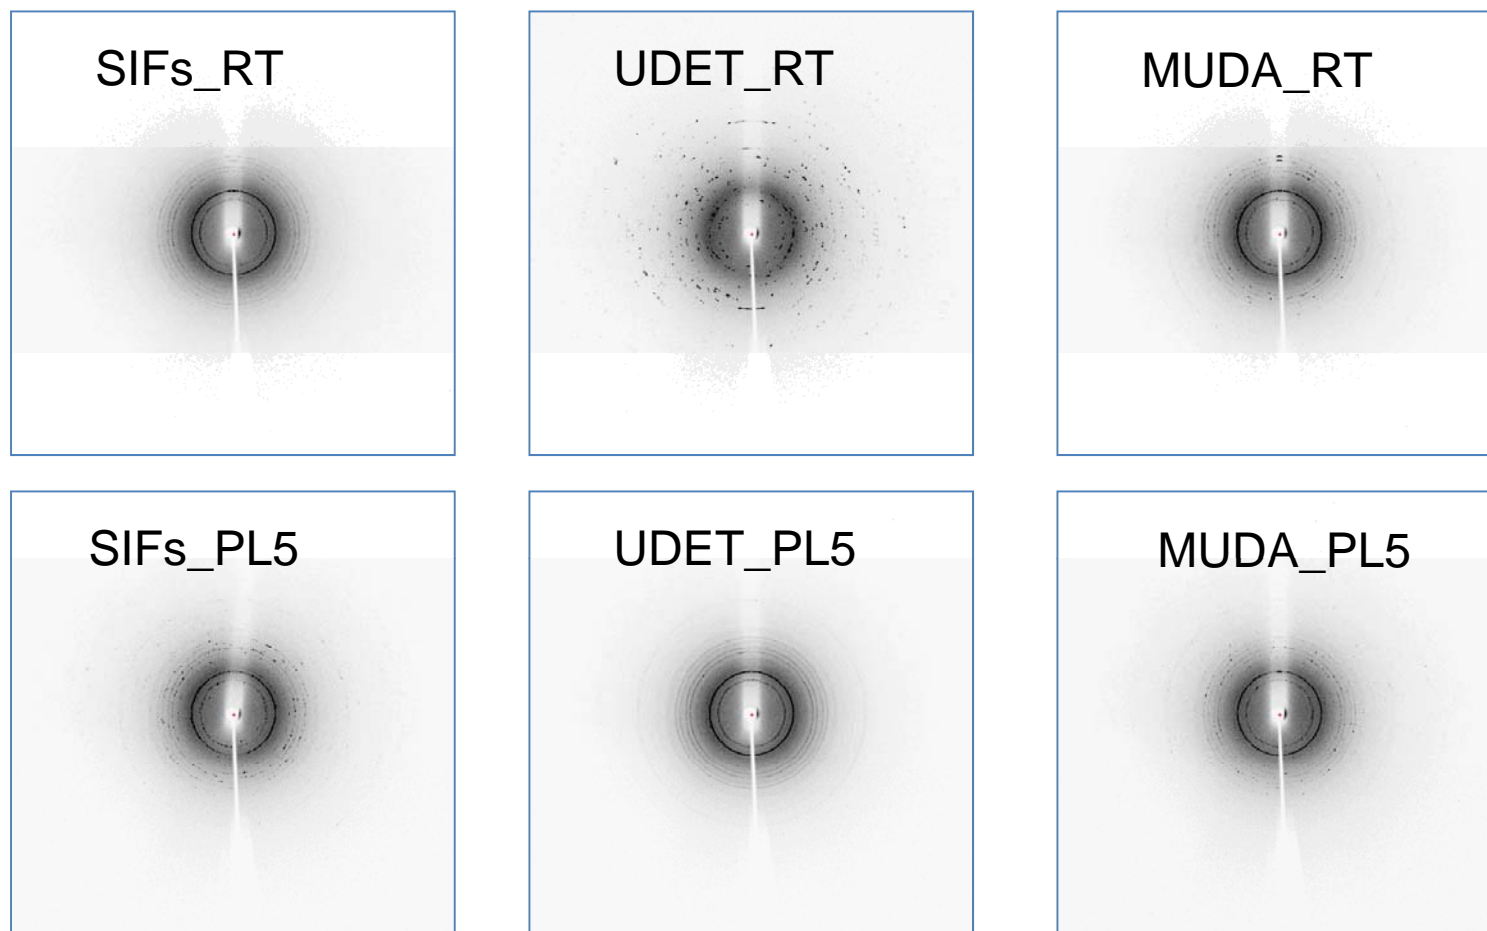

**Figure S11.** Experimental 2-D Powder X-Ray Diffraction patterns of L-alanine crystals grown on blank SIFs, UDET and MUDA-modified surfaces from L-alanine solutions 2.7 M pH= 5.3 on glass at room temperature (RT) and using microwave heating (PL5).
